# Supplementary material for: Leucine-rich repeat kinase LRRK1 regulates endosomal trafficking of the EGF receptor
Source: PubMed Central journal article supplement — Nat Commun. 2011 Jan 18;2:158–. doi: 10.1038/ncomms1161 (PMC3105304; doi:10.1038/ncomms1161), 2011-01-18
Supplement: ncomms1161-s1.pdf [file ncomms1161-s1.pdf]

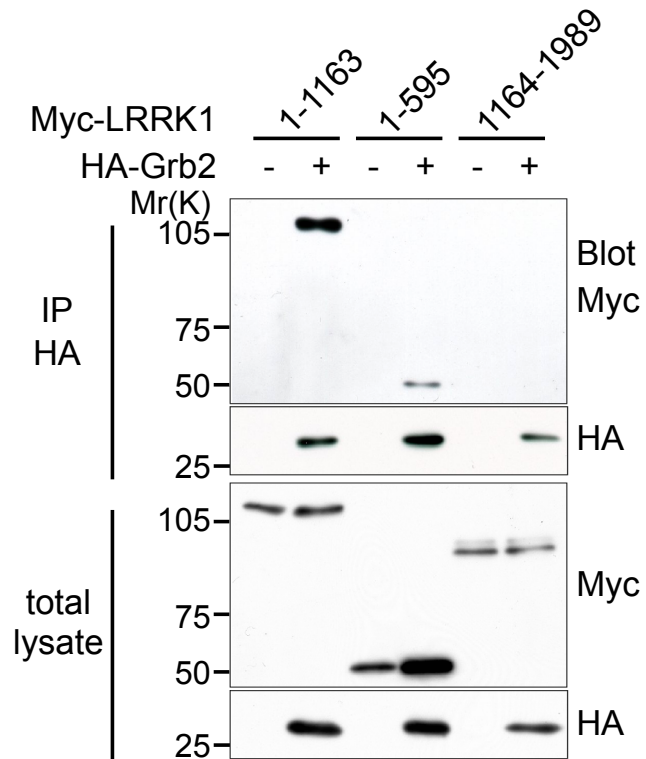

**Supplementary Figure S1. N-terminal fragments of LRRK1 bind to Grb2.**

COS7 cells were cotransfected with Myc-LRRK1(1-1163, 1-595 and 1164-1989) and HA-Grb2, as indicated. Complex formation was detected by immunoprecipitation (IP) with anti-HA antibodies, followed by immunoblotting (Blot) with anti-Myc antibodies.

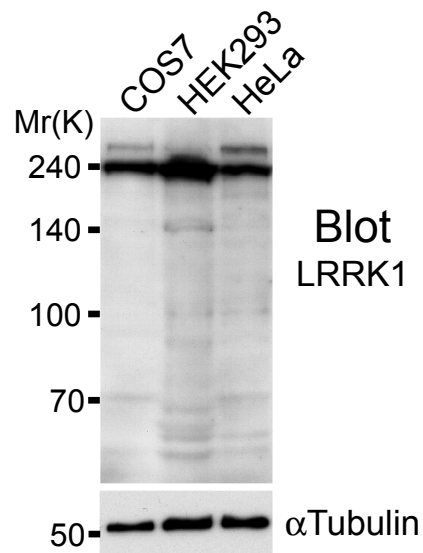

**Supplementary Figure S2. Detection of LRRK1 proteins by anti-LRRK1 antibody.**

Cell lysates were immunoblotted with anti-LRRK1 or anti- $\alpha$ Tubulin antibodies. The affinity-purified antibody against hLRRK1 specifically recognizes endogenous LRRK1 in extracts from COS7, HEK293, and HeLa cells, respectively.  $\alpha$ Tubulin serves as a loading control.

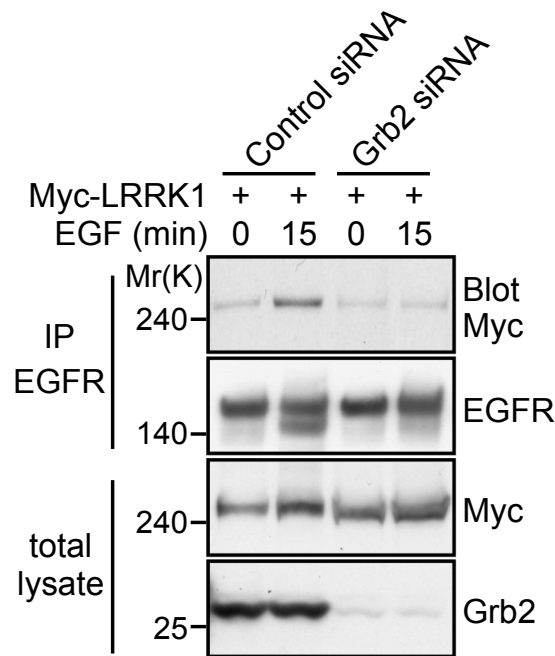

**Supplementary Figure S3. Interaction of LRRK1 with EGFR.**

HEK293 cells treated with control or Grb2 siRNA were transfected with Myc-LRRK1, and stimulated with 100 ng/ml EGF. Complex formation was detected by immunoprecipitation (IP) with anti-EGFR antibodies, followed by immunoblotting (Blot) with anti-Myc antibodies.

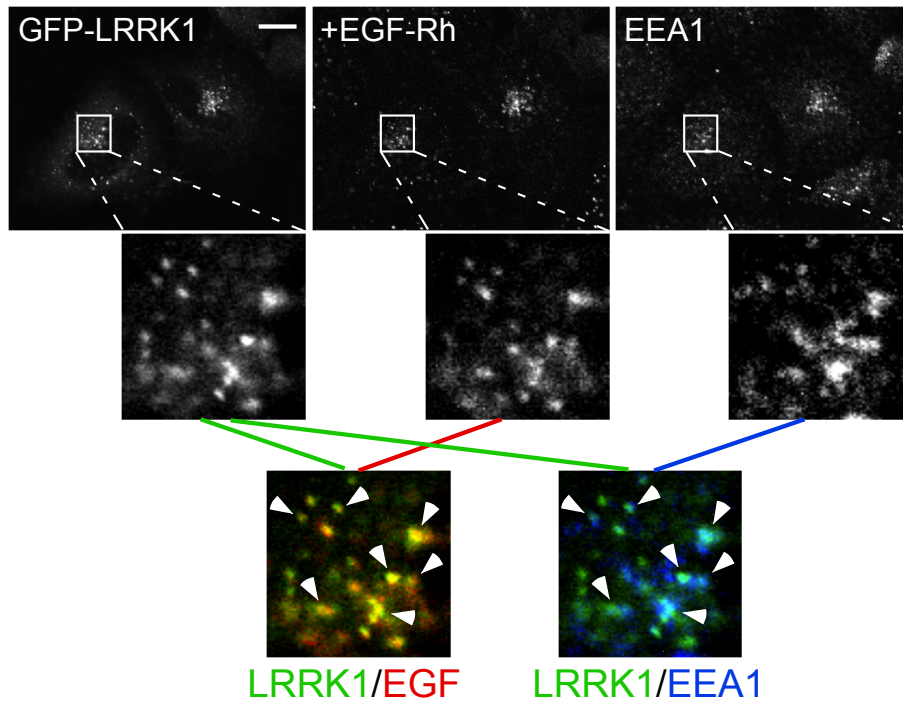

**Supplementary Figure S4. Colocalization of LRRK1 with EGF and EEA1.**

HeLa cells were transfected with GFP-LRRK1. After 16 hr of serum starvation, cells were incubated with 50 ng/ml EGF-Rh for 45 min at 4°C, followed by warming for 15 min at 37°C, and stained with anti-EEA1 antibodies. Cells were imaged by confocal microscopy. The boxed regions in Fig. 2b show magnified images. Colocalization of GFP-LRRK1 (green) with EGF-Rh (red) and EEA1 (blue) are indicated. Examples of colocalization of GFP-LRRK1, EGF-Rh and EEA1 are indicated with arrowheads. The scale bars represent 10 µm.

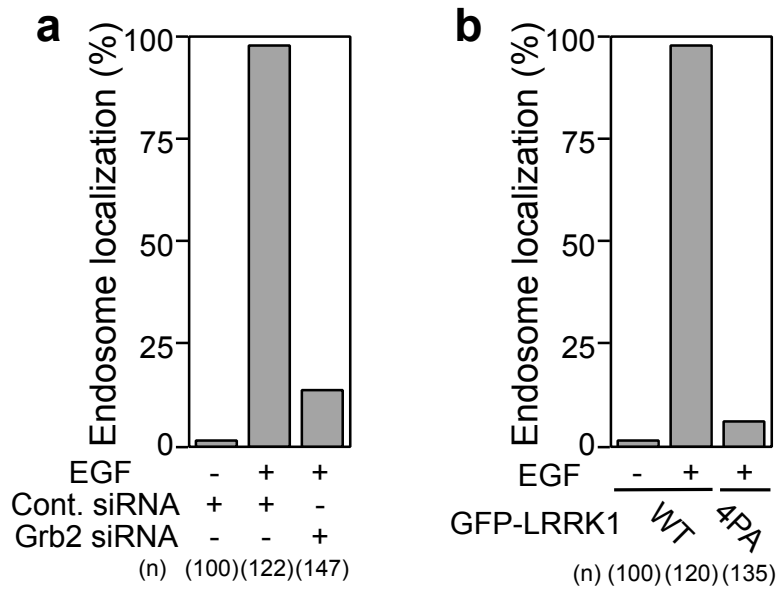

**Supplementary Figure S5. Quantification of LRRK1 localization to early endosomes.**

**(a)** Effect of Grb2 depletion on LRRK1 localization. HeLa S3 cells treated with control or Grb2 siRNA were transfected with GFP-LRRK1. After 16 hr of serum starvation, cells were stimulated with 100 ng/ml EGF for 15 min and stained with anti-EEA1 antibodies. Data are presented as the percentage of cells that have five or more EEA1-labeled vesicles that also contain GFP-LRRK1. Numbers (n) indicate the counted cells. Experiments were performed three times with similar results.

**(b)** Effect of the 4PA mutation on LRRK1 localization. HeLa cells were transfected with GFP-LRRK1 (wild type and the 4PA mutant). After 16 hr of serum starvation, cells were incubated with or without 50 ng/ml EGF-Rh for 45 min at 4°C, followed by warming for 15 min at 37°C, and stained with anti-EEA1 antibodies. Data are presented as the percentage of cells that have five or more EEA1-labeled vesicles that also contain GFP-LRRK1. Numbers (n) indicate the counted cells. Experiments were performed three times with similar results.

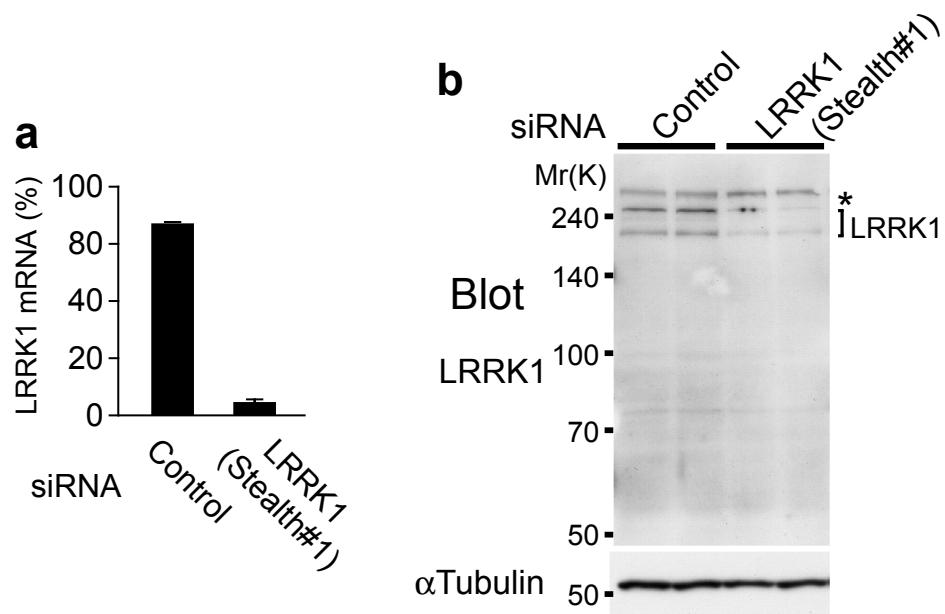

**Supplementary Figure S6. Effect of LRRK1 siRNA.**

**(a)** Quantitative real time RT-PCR analysis of LRRK1 transcript. HeLa S3 cells were treated with control or LRRK1 siRNA (Stealth#1). Levels of LRRK1 expression were normalized to those of actin expression. The values shown are average ( $\pm$ SD) of three independent experiments.

**(b)** Effect of LRRK1 siRNA. HeLa S3 cells were treated with control or LRRK1 siRNA (Stealth#1). Cell lysates were immunoblotted with anti-LRRK1 or anti- $\alpha$ Tubulin antibodies. Asterisk indicates a cross-reacting non-specific protein.

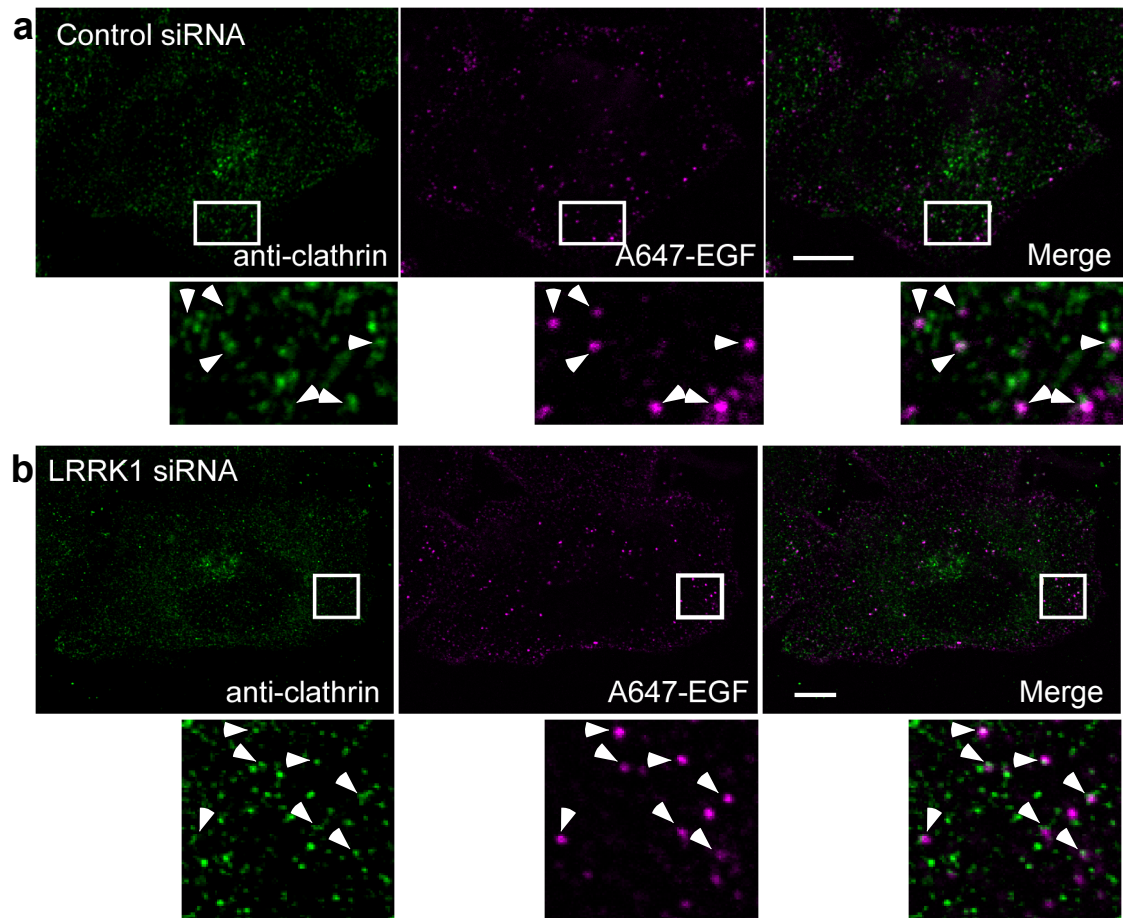

**Supplementary Figure S7. Colocalization of EGF with clathrin.**

HeLa S3 cells treated with control (a) or LRRK1 siRNA (Stealth#1) (b) were stimulated with 100 ng/ml Alexa 647-EGF for 5 min, and stained with anti-clathrin antibodies. The boxed regions are magnified. Examples of colocalization of Alexa 647-EGF and clathrin are indicated with arrowheads. The scale bars represent 10  $\mu$ m.

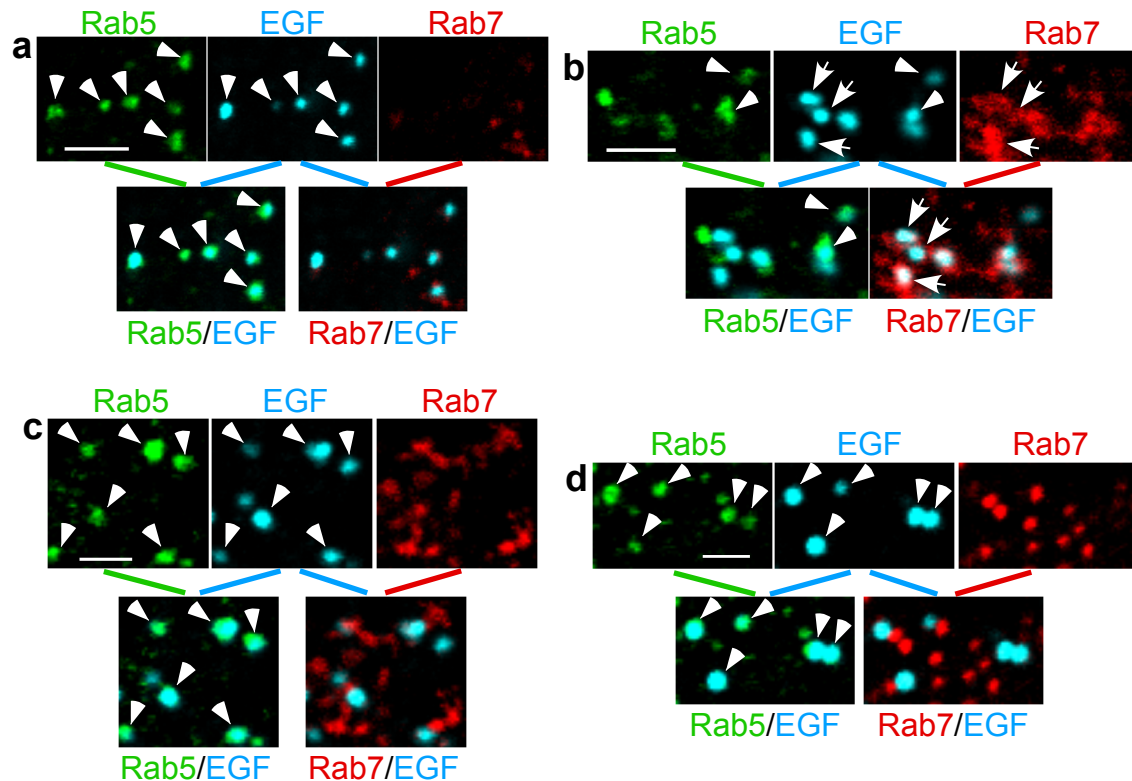

**Supplementary Figure S8. Colocalization of EGF with Rab5 and Rab7.**

HeLa S3 cells treated with control (a,b) or LRRK1 siRNA (Stealth#1) (c,d) were cotransfected with GFP-Rab5 and DsRed-Rab7. After 16 hr of serum starvation, cells were stimulated with 100 ng/ml Alexa 647-EGF for 3 min at 37°C, followed by washing to remove labeled EGF from the medium. The cells were fixed at 10 min (a,c) and 15 min (b,d) after the initial exposure to Alexa 647-EGF and imaged by confocal microscopy. The a-d correspond to the a-d in Fig. 3. Arrowheads and arrows indicate colocalization of Alexa 647-EGF with GFP-Rab5 and DsRed-Rab7, respectively. The scale bars represent 10  $\mu$ m.



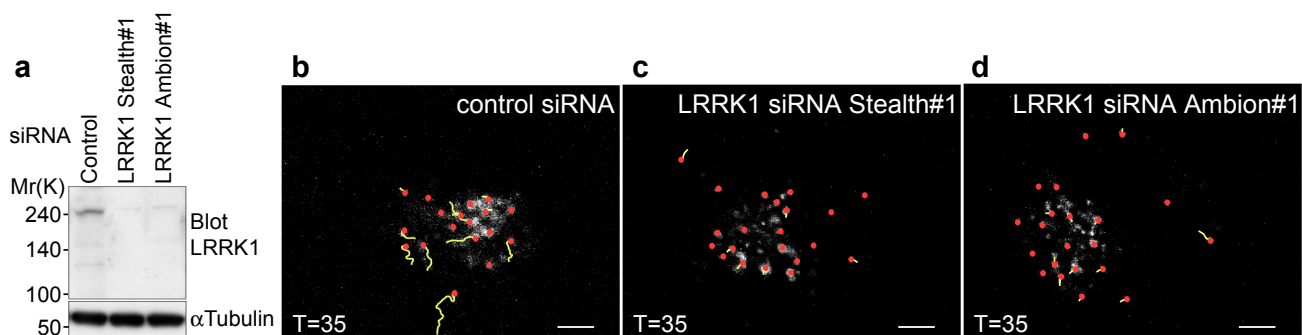

**Supplementary Figure S9. Depletion of LRRK1 inhibits the EGF motility.**

**(a)** Effect of LRRK1 siRNA. HeLa cells were treated with control or LRRK1 siRNA (Stealth#1 and Ambion#1). Cell lysates were immunoblotted with anti-LRRK1 or anti- $\alpha$ Tubulin antibodies.

**(b-d)** Effect of LRRK1 depletion on the motility of EGF in HeLa cells. HeLa cells were treated with control **(b)**, LRRK1 Stealth#1 **(c)** or LRRK1 Ambion#1 **(d)**. After 16 hr of serum starvation, cells were stimulated with 100 ng/ml Alexa 647-EGF for 3 min at 37 °C, followed by washing to remove labeled EGF from the medium. Movement of Alexa 647-EGF was observed and analyzed. Imaging started at 15 min after the initial exposure to Alexa 647-EGF, with frames captured at 1.165 sec intervals for 35 sec. The scale bars represent 10  $\mu$ m.

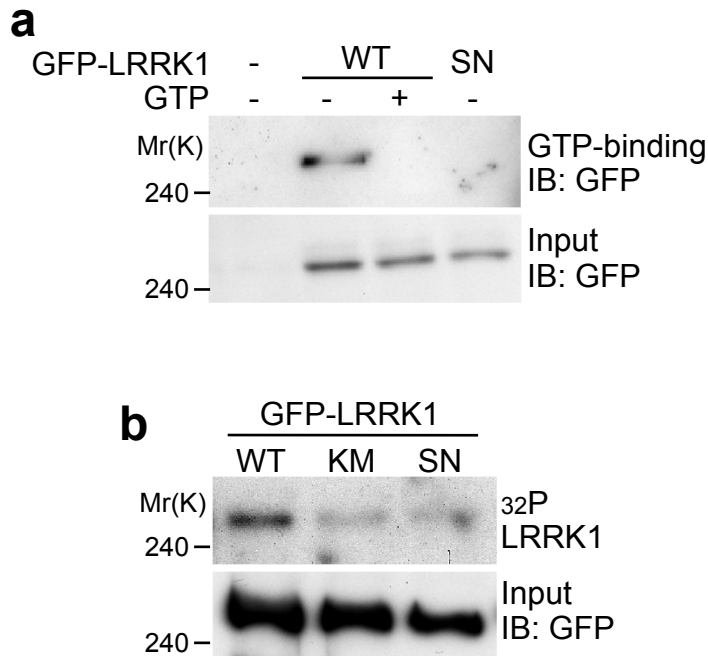

**Supplementary Figure S10. GTP-binding and kinase activities of LRRK1.**

**(a)** GTP-binding activity of LRRK1. COS7 cells were transfected with an empty vector, GFP-LRRK1 (WT) or GFP-LRRK1(S625N) (SN), as indicated. Using GTP-sepharose, GFP-LRRK1 or GFP-LRRK1(S625N) was affinity-purified from cytosolic extracts of transfected COS7 cells in the presence or absence of 2 mM GTP (upper panel). Equal protein input was confirmed by immunoblotting with anti-GFP antibodies (lower panel).

**(b)** Kinase activity of LRRK1. COS7 cells were transfected with GFP-LRRK1, GFP-LRRK1(K1243M) (KM) or GFP-LRRK1(S625N), as indicated. Immunoprecipitated samples were incubated with [ $\gamma$ -<sup>32</sup>P] ATP for 20 min at 30°C. Autophosphorylated LRRK1 was resolved by SDS-polyacrylamide gel electrophoresis and visualized by autoradiography.

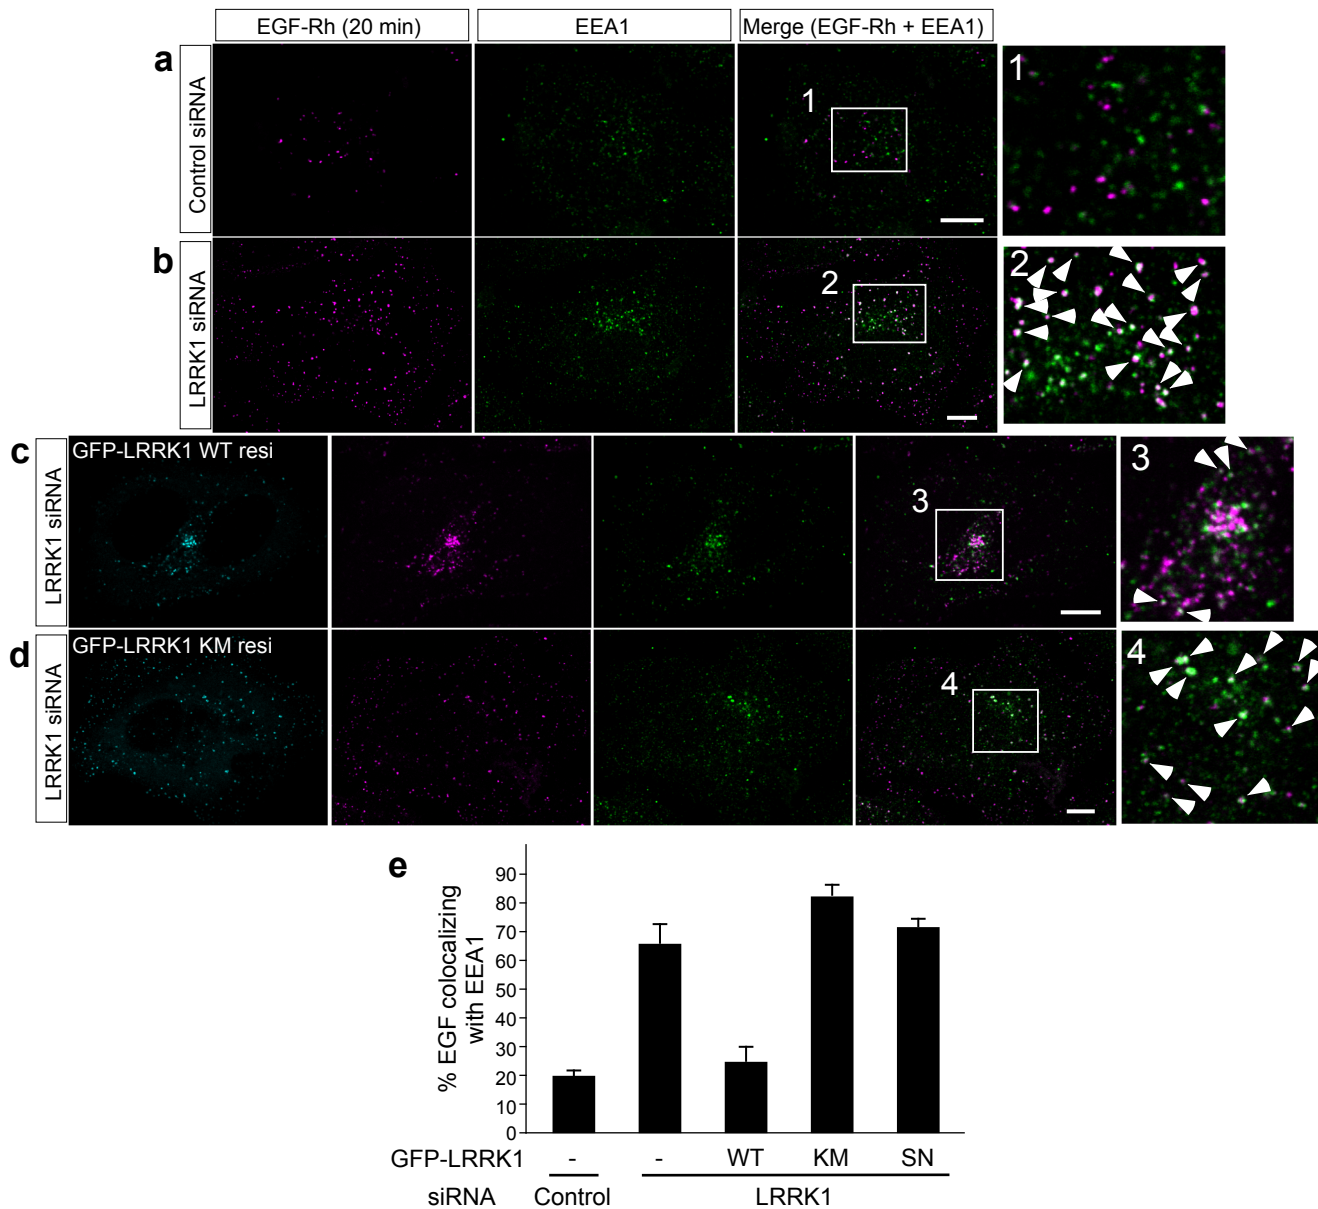

**Supplementary Figure S11. Rescue of the defect in EGFR progression from early endosomes caused by LRRK1 depletion.**

**(a,b)** HeLa S3 cells were treated with control **(a)** or LRRK1 siRNA (Stealth#1) **(b)**. After 16 hr of serum starvation, cells were stimulated with 50 ng/ml EGF-Rh for 3 min at 37°C, followed by washing to remove labeled EGF from the medium. The cells were fixed at 20 min after the initial exposure to EGF-Rh, stained with anti-EEA1 antibodies, and imaged by confocal microscopy. The boxed regions are magnified. Arrowheads indicate colocalization of EGF-Rh with EEA1. The scale bars represent 10  $\mu$ m.

**(c,d)** HeLa S3 cells treated with LRRK1 siRNA (Stealth#1) were transfected with siRNA-resistant GFP-LRRK1 **(c)** or siRNA-resistant GFP-LRRK1(K1243M) **(d)**. After 16 hr of serum starvation, cells were stimulated with 50 ng/ml EGF-Rh for 3 min at 37°C, followed by washing to remove labeled EGF from the medium. The cells were fixed at 20 min after the initial exposure to EGF-Rh, stained with anti-EEA1 antibodies, and imaged by confocal microscopy. The boxed regions are magnified. Arrowheads indicate colocalization of EGF-Rh with EEA1. The scale bars represent 10  $\mu$ m.

**(e)** Quantification of EGFR dissociated from early endosomes. Data are presented as percentages of EEA1-labeled EGF-Rh-containing vesicles out of total number of EGF-Rh-containing vesicles per cell. Values reflect the mean standard deviation of three independent experiments, with an average of 15 cells scored per experiment.

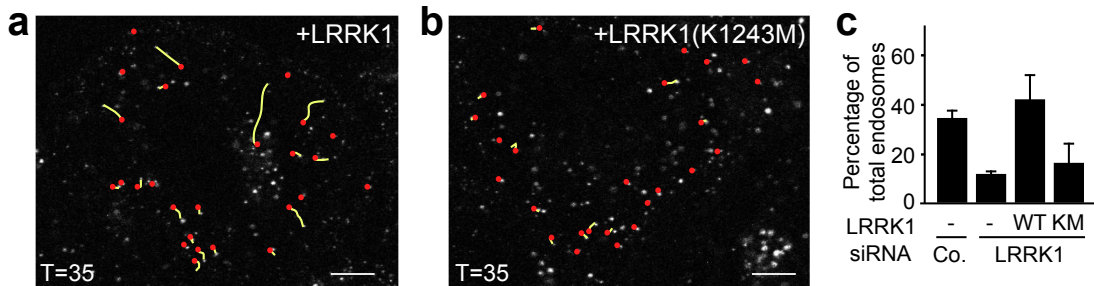

**Supplementary Figure S12. Rescue of the defect in EGF motility caused by LRRK1 depletion.**

(a,b) HeLa S3 cells treated with LRRK1 siRNA (Stealth#1) were transfected with siRNA-resistant GFP-LRRK1 (a) or siRNA-resistant GFP-LRRK1(K1243M) (b). After 16 hr of serum starvation, cells were stimulated with 100 ng/ml Alexa 647-EGF for 3 min at 37°C, followed by washing to remove labeled EGF from the medium. Movement of Alexa 647-EGF was observed and analyzed. Imaging started at 15 min after the initial exposure to Alexa 647-EGF, with frames captured at 1.165 sec intervals for 35 sec. The scale bars represent 10 μm.

(c) Quantification of the EGF motility. The movement of EGF (>1 μm) during the 35 sec observation period was quantified using the 'Manual Tracking' Image J plug-in. Values reflect the mean standard deviation of three independent experiments, with an average of 25 EGF-containing endosomes scored per experiment.

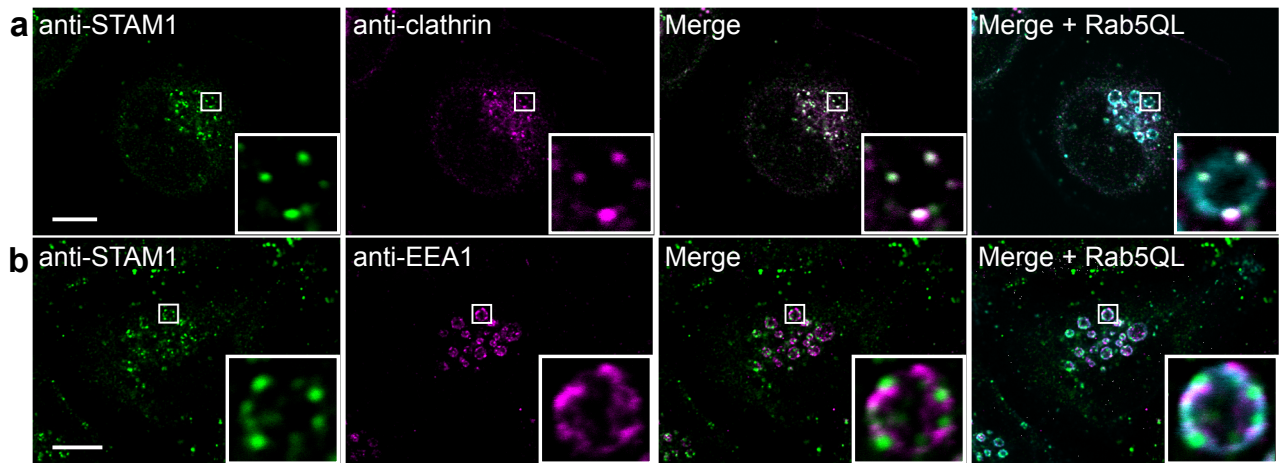

**Supplementary Figure S13. Localization of STAM1 on microdomains of early endosomes.**

HeLa S3 cells were transfected with GFP-Rab5(Q79L), and stained with anti-STAM1 and anti-clathrin antibodies (**a**) or anti-EEA1 antibodies (**b**), respectively. The boxed regions indicate the Rab5(Q79L)-induced enlarged endosomes and are magnified in the inset. White color in the merged images indicates colocalization. Experiments were performed three times with similar results. The scale bars represent 10  $\mu\text{m}$ .

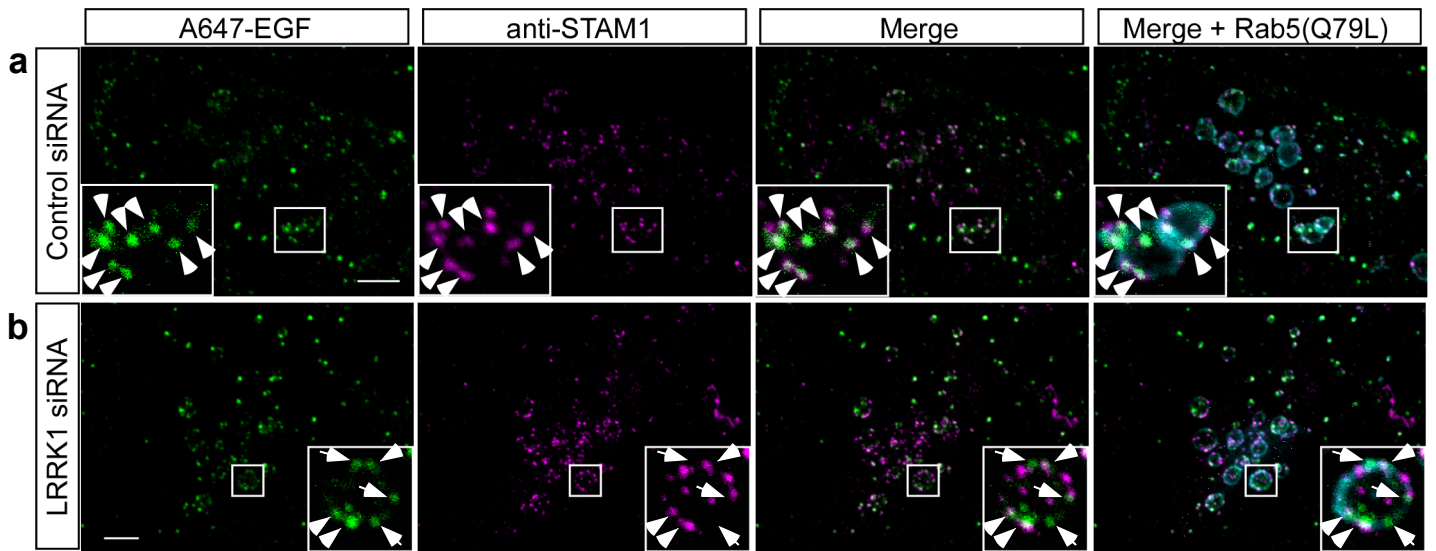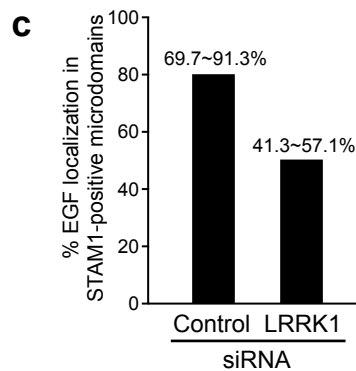

**Supplementary Figure S14. Effect of LRRK1 depletion on EGF localization to STAM1-positive microdomains of early endosomes.**

**(a,b)** HeLa S3 cells treated with control **(a)** or LRRK1 siRNA (Stealth#1) **(b)** were transfected with GFP-Rab5(Q79L), and stimulated with 100ng/ml Alexa 647-EGF for 10 min. The cells were fixed, stained with anti-STAM1 antibodies, and imaged by confocal microscopy. Images are three-dimensional reconstructions from a series of confocal Z-stack images (0.3  $\mu$ m-thick sections). The boxed regions are magnified in insets. Arrowheads and arrows indicate Alexa 647-EGF localization in STAM1-positive and -negative microdomains, respectively. The scale bars represent 5  $\mu$ m.

**(c)** Quantification of EGF localization to STAM1-positive microdomains of early endosomes. Data show the percentages of STAM1-labeled EGF microdomains per endosomes. Experiments were performed two times with an average of 15 cells (total 80 endosomes) scored per experiment.

| Protein ID         | Detection frequency <sup>a</sup> | Protein name                                                  |
|--------------------|----------------------------------|---------------------------------------------------------------|
| Grb2_HUMAN         | 3                                | Growth factor receptor-bound protein 2                        |
| CC37_HUMAN         | 3                                | Hsp90 co-chaperone Cdc37 (p50Cdc37)                           |
| IEFS_HUMAN         | 3                                | Stress-induced-phosphoprotein (ST11)                          |
| NM_024604_FLJ21908 | 3                                | hypothetical protein FLJ21908                                 |
| NM_014412_SIP      | 3                                | calcyclin binding protein                                     |
| NM_006704_SUGT1    | 3                                | suppressor of G2 allele of SKP1                               |
| NM_006600_NUDC     | 3                                | nuclear distribution gene C (A.nidulans) homolog              |
| SOS1_HUMAN         | 2                                | Son of sevenless protein homolog 1 (SOS1)                     |
| FKB5_HUMAN         | 2                                | 51 kDa FK506-binding protein (FKBP51)                         |
| NM_003707_RUVBL1   | 2                                | TATA binding protein interacting protein 49 kDa (RuvB-like 1) |
| REST_HUMAN         | 1                                | Cytoplasmic linker protein-170 alpha-2 (CLIP-170)             |

The same analysis was performed three times. The bait protein LRRK1 was excluded.

<sup>a</sup>Number indicates times the protein was detected among three trials.

**Supplementary Table S1.** Identification of LRRK1-interacting proteins by LC-MS/MS.
